# Supplementary material for: Krüppel homolog 1 and E93 mediate Juvenile hormone regulation of metamorphosis in the common bed bug, Cimex lectularius
Source: PubMed Central journal article supplement (PMC4869114; doi:10.1038/srep26092), 2016-05-17
Supplement: srep26092-s1.pdf [file srep26092-s1.pdf]

Supplementary data

Krüppel homolog 1 and E93 mediate Juvenile hormone regulation of metamorphosis in the common bed bug, *Cimex lectularius*

Hemant Gujar and Subba Reddy Palli

Table 1S: Primers used in the studies reported in the MS

|              | <b>dsRNA primers*</b>  | <b>Forward Primer</b>      | <b>Reverse Primer</b>     |
|--------------|------------------------|----------------------------|---------------------------|
| 1            | Met                    | CCAAGCTCGACCAGAGAGATAAG    | AGCTGCTCCGTGCTTGTAT       |
| 2            | Kr-h1                  | TTCGGATAACAACCTCCGCTTGGA   | GGTCCACAATCGGAGTCACACA    |
| 3            | Br                     | TGAGGCAAAGGTCTCTTTCGTCGT   | TTCATCGGCATTGCATTGTCCTGG  |
| 4            | E93                    | GACGTCATCACTAACACGATAA     | GAACACTCATCTCTCCTCTTTG    |
| <b>S.No.</b> | <b>qRT-PCR primers</b> | <b>Forward Primer</b>      | <b>Reverse Primer</b>     |
| 1            | Met                    | TCGTCCCTGGTCACAGAAACGAAA   | ACTGCGGTTGATCGCTCTTTCGATA |
| 2            | SRC                    | ATGAGCTCACTTTCGTC AAGCCT   | GGTCGCAGATGCTTGCTGTTCTTT  |
| 3            | Kr-h1                  | ACGCTTTGGCGTACTGAATAACGG   | TTTCGGGATCGCCGATTCTGTCT   |
| 4            | BR-C                   | ATCGCCAAGGGAAGACATGGAAGA   | TGGAGTCTTCCCGCTCATTGTGAA  |
| 5            | EcR                    | AAGGGAAGACTTATCACCGCCCAA   | TGTAATGGTAACCTGAAGCCCGGT  |
| 6            | HR3                    | TTGACCCTGTCAACGAGACAAGC    | ATCACATGCGAGGGTTGCAAGG    |
| 7            | HR4                    | AAGAAACCTCGATGATCTCTTAG    | GAGTTCAAGGTAG AAGGGTAATC  |
| 8            | E93                    | AAGCGTTGGTGAGTAAAGAG       | GTTGGAAGGAGGATAGGAAATAG   |
| 9            | InR                    | AGACGGCAGATGAGCTTGCTAAGT   | AATGGAGGCTGTTCAAGGGTCTCA  |
| 10           | Akt3                   | GGGCTGTGGAATCAATTCAGCCAT   | GCAGCCATTTTCATCGGACGTGTTA |
| 11           | TOR                    | GGACAATGGCCTCAAGTGTATGAAGC | ACCAATCGACCGACAAAGGTACGA  |
| 12           | ILP1                   | AACGTGGCTACAACATGGCGTTTC   | ATCCCTCGCTGCAGTACGATTCAA  |
| 13           | ILP2                   | GTGGCCGGACTTTAACGAAGATGT   | ATCCATTGCAAATGACTCGGAGCG  |
| 14           | Phantom                | TAATCGGCATTGTAGGGCCTGTCA   | CTTTCAGGTAGCGCAACAAACGGT  |
| 15           | Shade                  | TCCAAATCGTTCTTCCCTCACGA    | GCGAACAACAAAGCCCTTGACGAT  |
| 16           | iCAT2                  | GTCCACTCGAAGTACAAGAC       | CGATAGACATGAGATCGACTAAG   |
| 17           | Slif                   | GCTGGAGATGGTCTTCTATTC      | CCTGAAATCAATCCTGAGAGTAT   |
| 18           | NAT1                   | GCTCTAGGTTCTTACAACAAAT     | AACCGCCAATCCTGAATAAA      |
| 19           | JHAMT                  | GCTCTTCGTTTGGGATTCT        | CTTCTCAGAGGTGAAAGTCTAC    |

\*All dsRNA primers contain T7 sequences on the 5' end

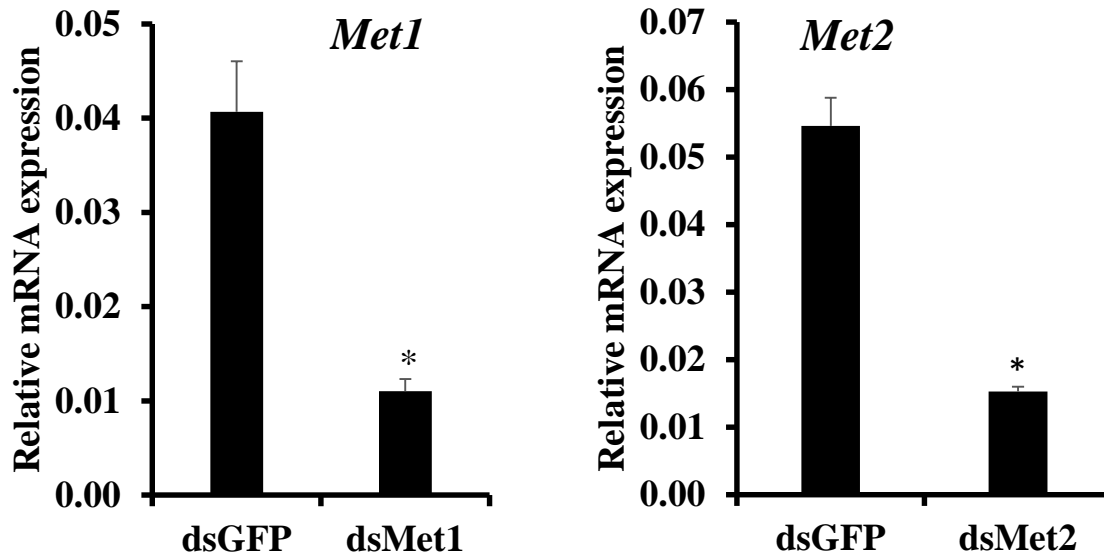

Fig. S1: Knockdown of Methoprene-tolerant protein was performed by injecting Met dsRNA into newly molted fourth instar nymphs. The insects were incubated for five days before feeding. Total RNA was collected two days after feeding, and knockdown was observed. Two different RNAs targeting different regions of Met were used. Each bar represents Mean + SD of three biological replicates (Star represents the level of significance with Student t-test at  $p \leq 0.05$ ).

Table 2S: Phenotype observed with Met mRNA knockdown in fourth instar nymphs.

| Percent | injection in 4th instar nymph |     |           |
|---------|-------------------------------|-----|-----------|
|         | Mortality                     | N5  | Phenotype |
| malE    | 0                             | 100 | N5        |
| Met     | 0                             | 100 | N5        |
